# Supplementary material
Source: MDPI journal article supplement (https://www.mdpi.com/1999-4907/13/8/1234)
Supplement: s1 [file s1]

Figure S1. The construction of a highway next to the study area (left) has increased the already pre-existing tendency of the water erosion to move sediments along the slope, therefore in 2019 a containment structure was built to slow down the ongoing process in the more pressing gully; however, sedimentation processes continue to occur alongside the highway on many other linear erosion forms (right).

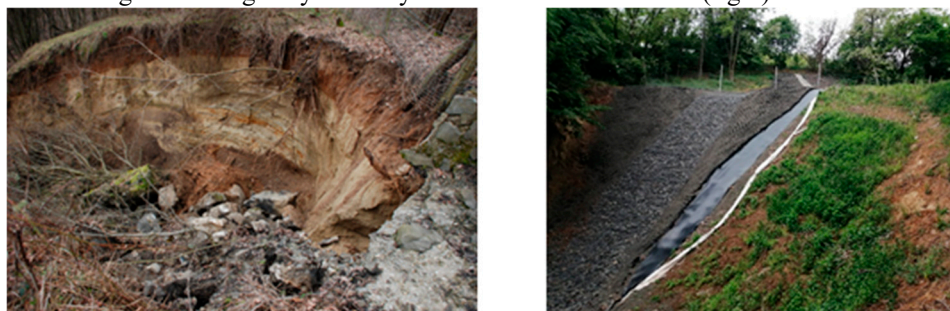

Figure S2. Location of the sampling points in each rooting for the measure-ment of soil characteristics.

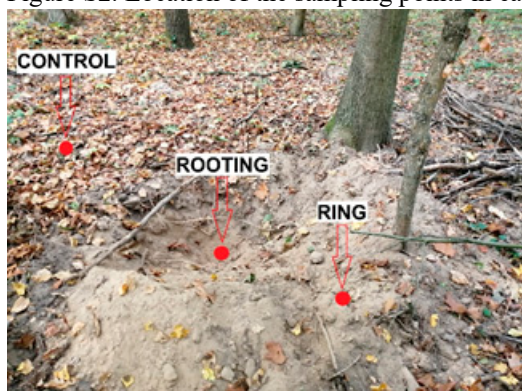

Table S1: Description of soil profiles in 6 deep rootings in the study area.

| Sample | Location | Soil horizon | Depth (cm) | Color         | Texture     |
|--------|----------|--------------|------------|---------------|-------------|
| 1      | Rooting  | A            | 0–37       | Grayish brown | Sandy loam  |
|        |          | AB           | 37–69      | Mixed         | Sandy loam  |
|        |          | B            | 69–100     | Redish        | Loamy sand  |
|        | Ring     | A            | 0–58       | Grayish brown | Loam        |
|        |          | AB           | 58–100     | Brownish red  | Sandy loam  |
|        |          | A            | 0–16       | Grayish-brown | Sandy loam  |
|        | Control  | AB           | 16–48      | Mixed         | Sandy loam  |
|        |          | B            | 48–100     | Redish        | Sandy loam  |
|        |          |              |            |               |             |
| 2      | Rooting  | A            | 0–26       | Grayish brown | Sandy loam  |
|        |          | AB           | 26–68      | Mixed         | Sandy loam  |
|        |          | B            | 68–91      | Redish        | Loamy sand  |
|        |          | C            | 91–100     | White         | Sand (fine) |
|        | Ring     | A            | 0–39       | Gray-brown    | Sandy loam  |
|        |          | AB           | 39–71      | Mixed         | Sandy loam  |
|        |          | B            | 71–100     | Redish        | Sandy loam  |
|        | Control  | A            | 0–36       | Dark brown    | Sandy loam  |
|        |          | B            | 36–86      | Red           | Sandy loam  |
|        |          | C            | 86–100     | White         | Sand        |
|        |          |              |            |               |             |
|        |          |              |            |               |             |
| 3      | Rooting  | A            | 0–28       | Grayish brown | Sandy loam  |
|        |          | B            | 28–79      | Whiteish red  | Sandy loam  |

|   |         |                |        |                |             |
|---|---------|----------------|--------|----------------|-------------|
|   | Ring    | C              | 79–100 | White          | Sand (fine) |
|   |         | A <sub>1</sub> | 0–25   | Grayish brown  | Loamy sand  |
|   |         | A <sub>2</sub> | 25–62  | Light brown    | Loamy sand  |
|   |         | B              | 62–100 | Light red      | Sandy loam  |
|   | Control | A              | 0–34   | Grayish brown  | Loamy sand  |
|   |         | AC             | 34–47  | Whiteish brown | Loamy sand  |
|   |         | BC             | 47–82  | Whiteish red   | Sandy loam  |
|   |         | B              | 82–100 | Red            | Sandy clay  |
| 4 | Rooting | A              | 0–25   | Grayish brown  | Sandy loam  |
|   |         | AB             | 25–41  | Redish brown   | Sandy loam  |
|   |         | B              | 41–75  | Red            | Sandy clay  |
|   |         | C <sub>1</sub> | 75–86  | White          | Sand        |
|   |         | C <sub>2</sub> | 86–100 | Grayish white  | Sand (fine) |
|   | Ring    | A              | 0–22   | Grayish brown  | Sandy loam  |
|   |         | AB             | 22–44  | Redish brown   | Sandy loam  |
|   |         | BC             | 44–62  | Whiteish red   | Sandy clay  |
|   |         | C              | 62–100 | White          | Clay        |
|   | Control | A              | 0–36   | Grayish brown  | Sandy loam  |
|   |         | AB             | 36–75  | Redish brown   | Sandy loam  |
|   |         | B              | 75–100 | Red            | Sandy clay  |

Table S2: Description of soil profiles in 6 deep rootings in the study area.

| Sample | Location | Soil horizon | Depth (cm) | Color          | Texture    |
|--------|----------|--------------|------------|----------------|------------|
| 5      | Rooting  | A            | 0–13       | Dark brown     | Sandy loam |
|        |          | AB           | 13–31      | Redish brown   | Sandy loam |
|        |          | B            | 31–58      | Red            | Sandy clay |
|        |          | BC           | 58–78      | Whiteish red   | Loamy sand |
|        |          | C            | 78–100     | White          | Sand       |
|        | Ring     | A            | 0–39       | Brown          | Sandy loam |
|        |          | AB           | 39–66      | Redish brown   | Sandy loam |
|        |          | B            | 66–89      | Red            | Sandy clay |
|        |          | BC           | 89–100     | Whiteish red   | Loamy sand |
|        | Control  | A            | 0–32       | Grayish brown  | Sandy loam |
|        |          | AB           | 32–47      | Redish brown   | Loamy clay |
|        |          | BC           | 47–66      | Whiteish red   | Sandy clay |
|        |          | B            | 66–100     | Red            | Clay       |
| 6      | Rooting  | AC           | 0–28       | Whiteish brown | Loamy sand |
|        |          | A            | 28–55      | Brown          | Sandy loam |

|  |         |                |        |                |             |
|--|---------|----------------|--------|----------------|-------------|
|  |         | AB             | 55–84  | Redish brown   | Sandy loam  |
|  |         | B              | 84–100 | Red            | Sandy loam  |
|  | Ring    | AC             | 0–71   | Whiteish brown | Loamy sand  |
|  |         | A              | 71–100 | Brown          | Sandy loam  |
|  | Control | A <sub>1</sub> | 0–18   | Light brown    | Sandy loam  |
|  |         | C              | 18–61  | White          | Sand (fine) |
|  |         | A <sub>2</sub> | 61–72  | Brown          | Sandy loam  |
|  |         | B              | 72–100 | Red            | Sandy loam  |
|  |         |                |        |                |             |
|  |         |                |        |                |             |
